# Supplementary material for: Preparation, crystallographic characterization and theoretical study of C70(CF3)16 and C70(CF3)18
Source: Royal Society of Chemistry journal article supplement (doi:10.1039/b603201j), 2006-01-01
Supplement: b603201j.pdf [file b603201j.pdf]

## **Preparation, crystallographic characterization and theoretical study of $C_{70}(CF_3)_{16}$ and $C_{70}(CF_3)_{18}$**

**Stanislav M. Avdoshenko, Alexey A. Goryunkov, Ilya N. Ioffe, Daria V. Ignat'eva, Lev N. Sidorov, Phillip Pattison, Erhard Kemnitz and Sergey I. Troyanov**

### **Table of contents**

- Carbon cage numeration of the experimental  $C_{70}(CF_3)_{16}$  and  $C_{70}(CF_3)_{18}$  isomers S2
- Schlegel diagrams, relative energies (at the DFT and AM1 levels of theory), and IUPAC lowest-locant abbreviation for the most stable isomers of  $C_{70}(CF_3)_{16}$  within the gap of 40 kJ/mol. S3-S7
- Schlegel diagrams, relative energies (at the DFT and AM1 levels of theory), and IUPAC lowest-locant abbreviation for the most stable isomers of  $C_{70}(CF_3)_{18}$  within the gap of 40 kJ/mol. S8-S9

Carbon cage numeration of the experimental  
 $C_{70}(CF_3)_{16}$  and  $C_{70}(CF_3)_{18}$  isomers

As in the paper and the same  
as for  $C_{70}(CF_3)_{10}$

According to IUPAC  
recommendation

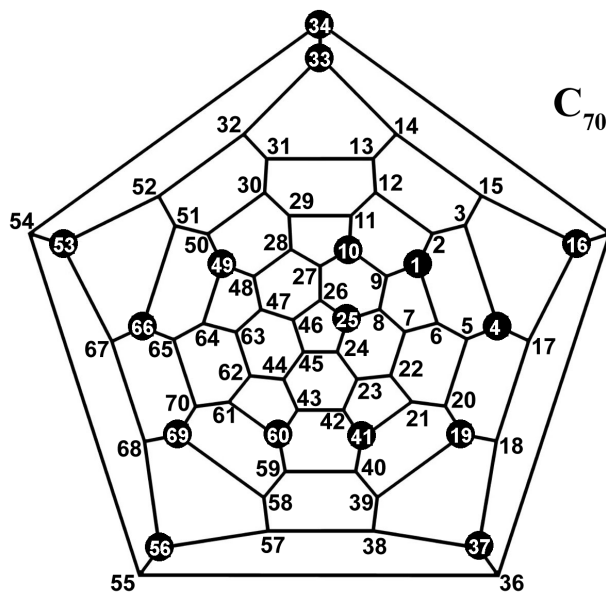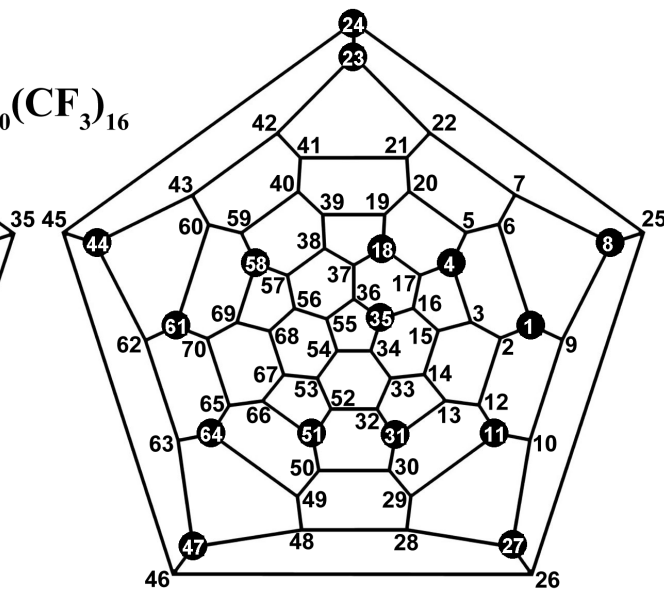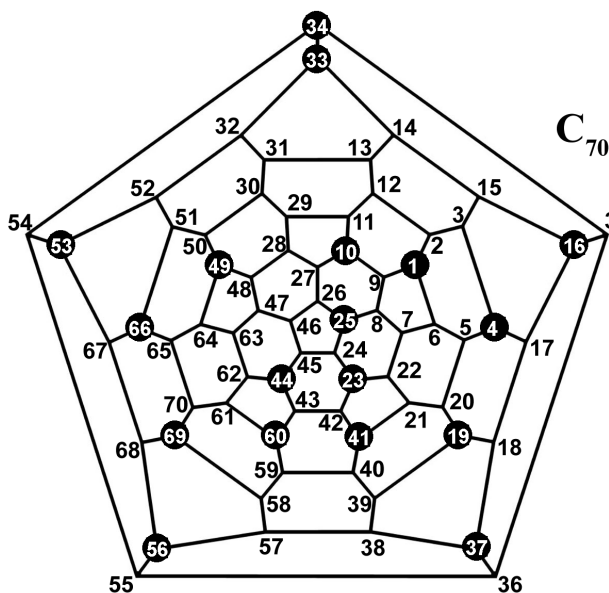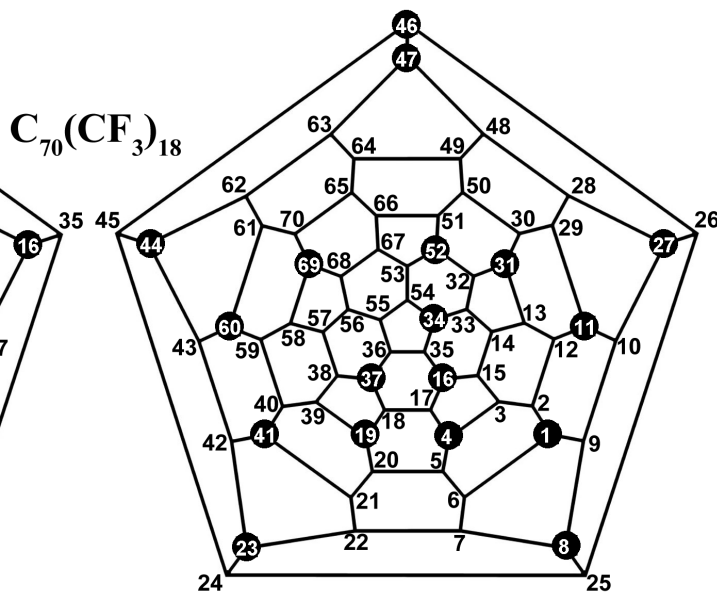

**Table 1.** Schlegel diagrams, relative energies (at the DFT and AM1 levels of theory), and IUPAC lowest-locant abbreviation for the most stable isomers of  $C_{70}(CF_3)_{16}$  within the gap of 40 kJ/mol (the field with experimentally observed isomer is shadowed).

| <i>N<sub>o</sub>N<sub>o</sub></i> | <i>Schlegel Diagrams of C<sub>70</sub>(CF<sub>3</sub>)<sub>16</sub></i>             | $\Delta_r H_0^\circ$<br>kJ/mol |      | <i>IUPAC lowes-locant abbreviation for hexadeca(trifluoromethyl)(C<sub>70</sub>-D<sub>5h(6)</sub>)[5,6]fullerene</i> |
|-----------------------------------|-------------------------------------------------------------------------------------|--------------------------------|------|----------------------------------------------------------------------------------------------------------------------|
|                                   |                                                                                     | DFT                            | AM1  |                                                                                                                      |
| 1                                 | 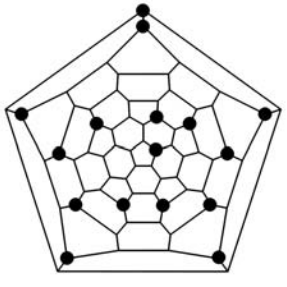   | 0.0                            | 0.0  | 1, 4, 8, 11, 18, 23, 24, 27, 31, 35, 44, 47, 51, 58, 61, 64                                                          |
| 2                                 |   | 0.8                            | 11.1 | 1, 4, 7, 11, 18, 21, 24, 31, 33, 35, 39, 51, 53, 58, 61, 64                                                          |
| 3                                 |  | 3.5                            | 17.8 | 1, 4, 8, 11, 16, 19, 24, 27, 31, 37, 41, 43, 51, 55, 56, 64                                                          |
| 4                                 |  | 3.5                            | 19.4 | 1, 4, 8, 11, 16, 19, 27, 31, 37, 41, 46, 47, 55, 60, 67, 69                                                          |
| 5                                 |  | 4.3                            | 15.0 | 1, 4, 8, 11, 19, 23, 26, 31, 34, 41, 45, 48, 52, 60, 63, 69                                                          |

| <i>N<sub>0</sub>N<sub>0</sub></i> | <i>Schlegel Diagrams of<br/>C<sub>70</sub>(CF<sub>3</sub>)<sub>16</sub></i>         | $\Delta_f H_0^\circ$<br>kJ/mol |      | <i>IUPAC lowes-locant abbreviation for<br/>hexadeca(trifluoromethyl)(C<sub>70</sub>-D<sub>5h(6)</sub>)[5,6]fullerene</i> |
|-----------------------------------|-------------------------------------------------------------------------------------|--------------------------------|------|--------------------------------------------------------------------------------------------------------------------------|
|                                   |                                                                                     | DFT                            | AM1  |                                                                                                                          |
| 6                                 | 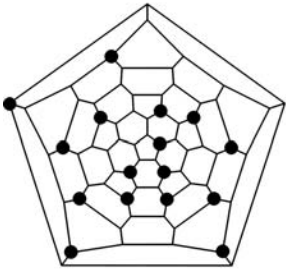   | 4.8                            | 8.6  | 1, 4, 8, 11, 16, 19, 23, 26, 31, 37, 41, 48, 55, 60, 67, 69                                                              |
| 7                                 |    | 8.0                            | 5.6  | 1, 4, 8, 11, 16, 19, 24, 27, 31, 37, 41, 43, 51, 53, 56, 64                                                              |
| 8                                 |   | 8.3                            | 5.3  | 1, 4, 8, 11, 16, 19, 27, 31, 37, 41, 44, 47, 55, 60, 67, 69                                                              |
| 9                                 |  | 15.4                           | 15.2 | 1, 4, 8, 11, 18, 23, 31, 33, 35, 38, 51, 53, 55, 58, 61, 64                                                              |
| 10                                |  | 15.4                           | 10.4 | 1, 4, 8, 11, 16, 19, 23, 26, 31, 34, 37, 41, 48, 52, 60, 69                                                              |

| <i>N<sub>0</sub>N<sub>0</sub></i> | <i>Schlegel Diagrams of C<sub>70</sub>(CF<sub>3</sub>)<sub>16</sub></i>             | $\Delta_f H_0^\circ$<br>kJ/mol |      | <i>IUPAC lowes-locant abbreviation for hexadeca(trifluoromethyl)(C<sub>70</sub>-D<sub>5h(6)</sub>)[5,6]fullerene</i> |
|-----------------------------------|-------------------------------------------------------------------------------------|--------------------------------|------|----------------------------------------------------------------------------------------------------------------------|
|                                   |                                                                                     | DFT                            | AM1  |                                                                                                                      |
| 11                                | 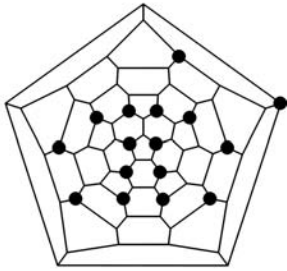   | 18.0                           | 9.5  | 1, 4, 8, 11, 19, 24, 27, 31, 36, 41, 43, 46, 51, 57, 62, 64                                                          |
| 12                                |    | 23.4                           | 11.4 | 1, 4, 8, 11, 16, 19, 23, 27, 31, 37, 41, 47, 55, 60, 67, 69                                                          |
| 13                                |   | 24.0                           | 20.9 | 1, 4, 7, 11, 16, 19, 24, 31, 34, 37, 41, 44, 47, 52, 60, 69                                                          |
| 14                                |  | 24.1                           | 20.3 | 1, 4, 7, 11, 16, 19, 24, 31, 37, 41, 44, 47, 55, 60, 67, 69                                                          |
| 15                                |  | 24.8                           | 24.0 | 1, 4, 7, 11, 18, 24, 31, 33, 35, 44, 47, 51, 53, 58, 61, 64                                                          |

| <i>N<sub>0</sub>N<sub>0</sub></i> | <i>Schlegel Diagrams of<br/>C<sub>70</sub>(CF<sub>3</sub>)<sub>16</sub></i>         | $\Delta_f H_0^\circ$<br>kJ/mol |      | <i>IUPAC lowes-locant abbreviation for<br/>hexadeca(trifluoromethyl)(C<sub>70</sub>-D<sub>5h(6)</sub>)[5,6]fullerene</i> |
|-----------------------------------|-------------------------------------------------------------------------------------|--------------------------------|------|--------------------------------------------------------------------------------------------------------------------------|
|                                   |                                                                                     | DFT                            | AM1  |                                                                                                                          |
| 16                                | 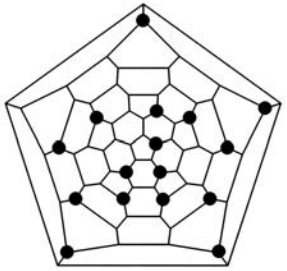   | 26.3                           | 10.6 | 1, 4, 8, 11, 16, 19, 23, 27, 31, 34, 37, 41, 47, 52, 60, 69                                                              |
| 17                                |    | 27.8                           | 24.0 | 1, 4, 7, 11, 18, 24, 31, 33, 35, 38, 51, 53, 55, 58, 61, 64                                                              |
| 18                                |   | 28.2                           | 24.1 | 1, 4, 7, 11, 24, 31, 33, 38, 44, 47, 51, 53, 55, 58, 61, 64                                                              |
| 19                                |  | 29.4                           | 10.5 | 1, 4, 8, 11, 18, 23, 27, 31, 35, 38, 44, 51, 55, 58, 61, 64                                                              |
| 20                                |  | 34.5                           | 16.1 | 1, 4, 8, 11, 19, 23, 26, 31, 34, 41, 48, 52, 55, 60, 67, 69                                                              |

| <i>N<sub>0</sub>N<sub>0</sub></i> | <i>Schlegel Diagrams of C<sub>70</sub>(CF<sub>3</sub>)<sub>16</sub></i>             | $\Delta_f H_0^\circ$<br>kJ/mol |      | <i>IUPAC lowes-locant abbreviation for hexadeca(trifluoromethyl)(C<sub>70</sub>-D<sub>5h(6)</sub>)[5,6]fullerene</i> |
|-----------------------------------|-------------------------------------------------------------------------------------|--------------------------------|------|----------------------------------------------------------------------------------------------------------------------|
|                                   |                                                                                     | DFT                            | AM1  |                                                                                                                      |
| 21                                | 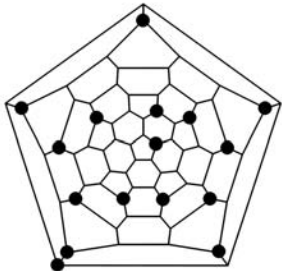   | 37.3                           | 20.4 | 1, 4, 8, 11, 18, 23, 27, 31, 35, 44, 46, 47, 51, 58, 61, 64                                                          |
| 22                                |    | 42.5                           | 15.4 | 1, 4, 8, 11, 18, 23, 27, 31, 35, 38, 47, 51, 55, 58, 61, 64                                                          |
| 23                                |   | > 30                           | 19.9 | 1, 4, 8, 11, 18, 23, 26, 27, 31, 35, 44, 47, 51, 58, 61, 64                                                          |
| 24                                |  | > 30                           | 22.7 | 1, 4, 8, 11, 18, 23, 25, 27, 31, 35, 44, 47, 51, 58, 61, 64                                                          |
| 25                                |  | > 30                           | 23.9 | 1, 4, 8, 11, 18, 23, 24, 27, 31, 35, 38, 51, 55, 58, 61, 64                                                          |

**Table 2.** Schlegel diagrams, relative energies (at the DFT and AM1 levels of theory), and IUPAC lowest-locant abbreviation for the most stable isomers of  $C_{70}(CF_3)_{18}$  within the gap of 40 kJ/mol (the field with experimentally observed isomer is shadowed).

| <i>N<sub>o</sub>N<sub>o</sub></i> | <i>Schlegel Diagrams of</i><br>$C_{70}(CF_3)_{18}$                                  | $\Delta_f H_0^\circ$<br>kJ/mol |      | <i>IUPAC lowes-locant abbreviation for</i><br><i>octadeca(trifluoromethyl)(C<sub>70</sub>-D<sub>5h(6)</sub>)[5,6]fullerene</i> |
|-----------------------------------|-------------------------------------------------------------------------------------|--------------------------------|------|--------------------------------------------------------------------------------------------------------------------------------|
|                                   |                                                                                     | DFT                            | AM1  |                                                                                                                                |
| 1                                 | 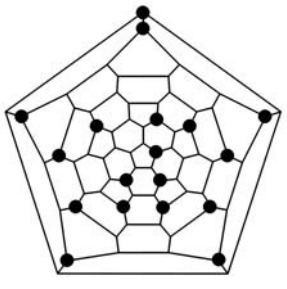   | 0.0                            | 0.0  | 1, 4, 8, 11, 16, 19, 23, 27, 31, 34, 37, 41, 44, 46, 47, 52, 60, 69                                                            |
| 2                                 |   | 6.4                            | 10.0 | 1, 4, 7, 11, 18, 21, 24, 31, 33, 35, 39, 44, 47, 51, 53, 58, 61, 64                                                            |
| 3                                 |  | 8.6                            | 17.6 | 1, 4, 8, 11, 16, 19, 23, 26, 31, 34, 37, 41, 45, 48, 52, 60, 63, 69                                                            |
| 4                                 |  | 24.3                           | 5.8  | 1, 4, 8, 11, 18, 23, 24, 27, 31, 35, 38, 44, 47, 51, 55, 58, 61, 64                                                            |
| 5                                 |  | 24.9                           | 6.9  | 1, 4, 8, 11, 16, 19, 24, 27, 31, 37, 41, 43, 46, 51, 53, 56, 62, 64                                                            |



| <i>N<sub>0</sub>N<sub>0</sub></i> | <i>Schlegel Diagrams of<br/>C<sub>70</sub>(CF<sub>3</sub>)<sub>18</sub></i>         | $\Delta_f H_0^\circ$<br>kJ/mol |      | <i>IUPAC lowes-locant abbreviation for<br/>octadeca(trifluoromethyl)(C<sub>70</sub>-D<sub>5h(6)</sub>)[5,6]fullerene</i> |
|-----------------------------------|-------------------------------------------------------------------------------------|--------------------------------|------|--------------------------------------------------------------------------------------------------------------------------|
|                                   |                                                                                     | DFT                            | AM1  |                                                                                                                          |
| 6                                 | 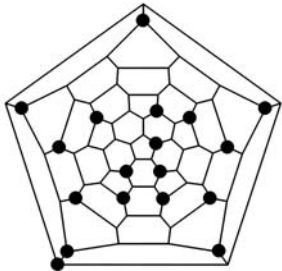   | 29.7                           | 20.5 | 1, 4, 8, 11, 16, 19, 23, 24, 27, 31, 34, 37, 41, 44, 47, 52, 60, 69                                                      |
| 7                                 |    | 30.3                           | 20.0 | 1, 4, 8, 11, 16, 19, 23, 24, 27, 31, 37, 41, 44, 47, 55, 60, 67, 69                                                      |
| 8                                 |   | 34.7                           | 15.0 | 1, 4, 8, 11, 16, 19, 23, 26, 31, 34, 37, 41, 48, 52, 55, 60, 67, 69                                                      |
| 9                                 |  | 43.8                           | 13.9 | 1, 4, 8, 11, 16, 19, 23, 27, 31, 34, 37, 41, 47, 52, 55, 60, 67, 69                                                      |
